# Supplementary material for: Characterization of celiac disease related oat proteins: bases for the development of high quality oat varieties suitable for celiac patients
Source: PubMed Central journal article supplement (PMC5314403; doi:10.1038/srep42588), 2017-02-17
Supplement: srep42588-s1.pdf [file srep42588-s1.pdf]

## **Characterization of celiac disease related oat proteins: bases for the development of high quality oat varieties suitable for celiac patients**

María J. Gimenez<sup>1,\*</sup>, Ana Real<sup>2</sup>, M. Dolores García<sup>1</sup>, Carolina Sousa<sup>3</sup>, and FranciscoBarro<sup>1</sup>

1 Instituto de Agricultura Sostenible, CSIC, Córdoba, Spain

2 INSERM U1218 "ACTION", Bordeaux University, France

3 Departamento de Microbiología y Parasitología, Facultad de Farmacia, Universidad de Sevilla, Sevilla, Spain

\* mjga06@ias.csic.es

Supplementary Table S1. Raw data.

| ID   | Starch (%) | Protein (%) | Monomeric (ug/100mg) | Aggregate (ug/100mg) | Prolamin (ug/100mg) | Non prolamin (ug/100mg) | Gluten (ppm) | Panicle emergence (days) | Height (cm) |
|------|------------|-------------|----------------------|----------------------|---------------------|-------------------------|--------------|--------------------------|-------------|
| AV1  | 37.07      | 15.81       | 22.12                | 10.97                | 33.09               | 127.30                  | 10-20        | 117                      | 1           |
| AV2  | 35.19      | 12.29       | 16.23                | 7.10                 | 23.34               | 101.03                  | 10-20        | na                       | na          |
| AV3  | 21.18      | 12.28       | 9.59                 | 3.11                 | 12.70               | 110.90                  | 10-20        | na                       | na          |
| AV4  | 31.44      | 16.02       | 18.60                | 9.93                 | 28.53               | 133.23                  | 3-10         | na                       | na          |
| AV5  | 26.92      | 12.12       | 13.82                | 4.49                 | 18.31               | 103.99                  | 10-20        | na                       | na          |
| AV6  | 22.06      | 12.87       | 8.61                 | 8.02                 | 16.62               | 113.11                  | 3-10         | na                       | na          |
| AV7  | 24.05      | 12.51       | 12.20                | 6.16                 | 18.37               | 107.90                  | 10-20        | na                       | na          |
| AV8  | 39.38      | 11.35       | 16.03                | 6.48                 | 22.51               | 92.27                   | na           | na                       | na          |
| AV9  | 17.87      | 10.91       | 12.92                | 5.81                 | 18.73               | 91.53                   | 3-10         | na                       | na          |
| AV10 | 22.95      | 13.82       | 11.36                | 4.71                 | 16.07               | 123.03                  | 3-10         | na                       | na          |
| AV11 | 37.62      | 13.30       | 18.01                | 12.70                | 30.71               | 104.81                  | na           | 112                      | 1.1         |
| AV12 | 34.2       | 14.70       | 21.07                | 10.48                | 31.56               | 118.05                  | na           | 108                      | 1.3         |
| AV13 | 39.05      | 7.78        | 18.63                | 8.45                 | 27.07               | 52.96                   | 10-20        | 106                      | 1.3         |
| AV14 | 39.27      | 14.41       | 24.23                | 11.15                | 35.38               | 111.59                  | 3-10         | 106                      | 1.5         |
| AV15 | 39.49      | 14.54       | 19.59                | 8.24                 | 27.84               | 120.20                  | 3-10         | 102                      | 1.3         |
| AV16 | 40.04      | 15.84       | 21.89                | 8.72                 | 30.61               | 130.43                  | na           | 107                      | 1.2         |
| AV17 | 42.69      | 16.42       | 24.55                | 13.25                | 37.80               | 129.72                  | 30-40        | 109                      | 1.3         |
| AV18 | 39.38      | 16.83       | 24.69                | 14.93                | 39.62               | 132.10                  | na           | 111                      | 1.4         |
| AV19 | 39.16      | 15.46       | 20.60                | 11.19                | 31.78               | 125.53                  | na           | 113                      | 1.3         |
| AV20 | 30.01      | 18.62       | 20.64                | 11.04                | 31.68               | 157.19                  | 10-20        | 118                      | 1.4         |
| AV21 | 35.96      | 17.96       | 21.56                | 12.56                | 34.13               | 148.21                  | 10-20        | 113                      | 1.4         |
| AV22 | 27.47      | 20.02       | 22.30                | 12.26                | 34.56               | 168.34                  | 10-20        | 118                      | 1.5         |
| AV23 | 34.31      | 19.25       | 24.78                | 8.60                 | 33.38               | 161.75                  | 3-10         | 116                      | 1.5         |
| AV24 | 42.36      | 16.10       | 18.35                | 9.18                 | 27.53               | 135.46                  | 3-10         | 100                      | 1.1         |
| AV25 | 43.35      | 14.49       | 22.70                | 13.34                | 36.04               | 111.41                  | na           | 100                      | 1.25        |
| AV26 | 33.6       | 18.05       | 24.95                | 11.80                | 36.75               | 146.35                  | 10-20        | 118                      | 1.3         |
| AV27 | 41.26      | 15.23       | 22.60                | 13.59                | 36.19               | 118.49                  | na           | 108                      | 1.2         |
| AV28 | 44.79      | 16.72       | 23.66                | 11.91                | 35.58               | 134.01                  | 10-20        | 118                      | 1.2         |
| AV29 | 43.79      | 14.62       | 21.69                | 13.27                | 34.96               | 113.62                  | 10-20        | 113                      | 1.6         |
| AV30 | 39.16      | 17.18       | 20.30                | 13.31                | 33.62               | 140.47                  | 20-30        | 124                      | 1.6         |
| AV31 | 39.27      | 12.06       | 12.89                | 10.76                | 23.64               | 98.57                   | 30-40        | 126                      | 1.6         |
| AV32 | 38.39      | 15.79       | 12.26                | 10.14                | 22.40               | 136.99                  | 10-20        | 109                      | 1.4         |
| AV33 | 43.02      | 18.17       | 17.66                | 12.91                | 30.57               | 153.73                  | 10-20        | 117                      | 1.55        |
| AV34 | 40.93      | 14.22       | 13.59                | 6.77                 | 20.36               | 123.57                  | na           | 107                      | 1.2         |
| AV35 | 45.89      | 16.33       | 21.93                | 12.31                | 34.23               | 132.40                  | 10-20        | 126                      | 1.5         |
| AV36 | 40.93      | 17.15       | 20.04                | 7.73                 | 27.78               | 146.67                  | 10-20        | 109                      | 1.35        |
| AV37 | 39.49      | 16.99       | 18.86                | 12.18                | 31.04               | 142.06                  | 20-30        | 122                      | 1.7         |
| AV38 | 42.36      | 16.32       | 19.24                | 11.36                | 30.60               | 135.66                  | na           | 124                      | 1.6         |
| AV39 | 34.53      | 18.17       | 23.30                | 6.11                 | 29.42               | 155.26                  | 10-20        | 122                      | 1.7         |
| AV40 | 40.82      | 17.29       | 22.35                | 12.09                | 34.44               | 141.85                  | 10-20        | 107                      | 1.35        |
| AV41 | 42.8       | 17.02       | 20.77                | 16.21                | 36.98               | 136.87                  | 10-20        | 117                      | 1.4         |
| AV49 | 44.46      | 15.72       | 20.70                | 15.22                | 35.92               | 124.56                  | 3-10         | 107                      | 1.25        |
| AV50 | 43.79      | 15.61       | 19.17                | 14.34                | 33.50               | 125.77                  | 10-20        | 107                      | 1.25        |
| AV51 | 44.68      | 17.53       | 23.30                | 15.90                | 39.20               | 139.67                  | na           | 112                      | 1.2         |
| AV52 | 43.13      | 12.79       | 25.06                | 13.41                | 38.47               | 93.02                   | 3-10         | 112                      | 1.2         |
| AV53 | 41.04      | 14.48       | 25.78                | 13.94                | 39.72               | 108.49                  | na           | 112                      | 1.1         |
| AV54 | 40.38      | 16.38       | 18.83                | 14.80                | 33.63               | 133.07                  | 3-10         | 109                      | 1.1         |
| AV55 | 43.91      | 16.85       | 25.14                | 16.73                | 41.87               | 130.17                  | <3           | 109                      | 1.15        |
| AV56 | 44.68      | 17.75       | 25.45                | 13.08                | 38.53               | 142.22                  | 30-40        | 112                      | 1.4         |
| AV57 | 46.44      | 16.18       | 26.76                | 12.62                | 39.38               | 125.76                  | 30-40        | 107                      | 1.2         |
| AV58 | 44.79      | 14.10       | 20.60                | 11.68                | 32.28               | 111.42                  | 3-10         | 107                      | 1.3         |
| AV59 | 40.71      | 16.42       | 15.81                | 15.85                | 31.66               | 135.12                  | 3-10         | 111                      | 1.4         |
| AV60 | 34.2       | 18.51       | 25.19                | 11.79                | 36.98               | 151.20                  | 10-20        | 114                      | 1.5         |
| AV61 | 34.53      | 18.43       | 22.59                | 10.32                | 32.91               | 154.11                  | 10-20        | 114                      | 1.5         |
| AV62 | 38.39      | 16.74       | 22.80                | 11.46                | 34.27               | 135.97                  | <3           | 112                      | 1.5         |
| AV63 | 40.04      | 19.64       | 28.95                | 12.02                | 40.97               | 158.88                  | na           | 114                      | 1.5         |
| AV64 | 34.42      | 18.90       | 23.77                | 12.22                | 35.98               | 155.94                  | na           | 116                      | 1.5         |
| AV65 | 42.58      | 15.13       | 21.97                | 11.79                | 33.76               | 120.28                  | 3-10         | 109                      | 1.4         |
| AV66 | 35.08      | 17.16       | 23.07                | 10.90                | 33.98               | 140.61                  | na           | 109                      | 1.3         |
| AV67 | 44.46      | 14.58       | 20.98                | 10.62                | 31.60               | 117.25                  | 10-20        | 107                      | 1.35        |
| AV68 | 26.81      | 16.32       | 19.99                | 8.67                 | 28.66               | 137.33                  | 20-30        | 124                      | 1.6         |
| AV69 | 35.08      | 16.89       | 19.62                | 11.04                | 30.66               | 141.30                  | na           | 116                      | 1.4         |
| AV70 | 28.35      | 18.59       | 20.33                | 7.30                 | 27.63               | 160.86                  | 10-20        | 116                      | 1.4         |
| AV71 | 32.98      | 15.95       | 19.24                | 6.95                 | 26.19               | 135.87                  | 10-20        | 116                      | 1.5         |
| AV72 | 37.29      | 14.55       | 19.61                | 9.69                 | 29.30               | 118.89                  | na           | 107                      | 1.3         |
| AV73 | 28.68      | 18.10       | 22.54                | 7.57                 | 30.10               | 153.92                  | 20-30        | 122                      | 1.6         |
| AV74 | 27.25      | 19.35       | 21.16                | 6.57                 | 27.73               | 168.62                  | 3-10         | 122                      | 1.6         |
| AV75 | 26.7       | 19.42       | 24.51                | 9.27                 | 33.78               | 163.87                  | na           | 113                      | 1.45        |
| AV76 | 25.7       | 15.38       | 19.38                | 6.25                 | 25.62               | 130.72                  | 10-20        | 122                      | 1.6         |
| AV77 | 31.66      | 17.89       | 22.44                | 9.22                 | 31.66               | 150.28                  | na           | 116                      | 1.6         |

Supplementary Table S1. Raw data.

| ID    | Starch (%) | Protein (%) | Monomeric (ug/100mg) | Aggregate (ug/100mg) | Prolamin (ug/100mg) | Non prolamin (ug/100mg) | Gluten (ppm) | Panicle emergence (days) | Height (cm) |
|-------|------------|-------------|----------------------|----------------------|---------------------|-------------------------|--------------|--------------------------|-------------|
| AV78  | 37.18      | 19.29       | 23.35                | 10.32                | 33.67               | 162.42                  | <3           | 109                      | 1.5         |
| AV79  | 30.01      | 19.03       | 23.11                | 7.87                 | 30.98               | 162.27                  | na           | 116                      | 1.45        |
| AV80  | 37.29      | 16.08       | 26.60                | 11.63                | 38.23               | 126.08                  | na           | 101                      | 1.15        |
| AV81  | 39.05      | 16.17       | 22.09                | 12.01                | 34.10               | 130.86                  | na           | 109                      | 1.4         |
| AV82  | 36.96      | 16.33       | 18.84                | 8.59                 | 27.43               | 138.54                  | >40          | 112                      | 1.3         |
| AV83  | 38.94      | 14.50       | 13.76                | 7.43                 | 21.19               | 125.95                  | 3-10         | 112                      | 1.6         |
| AV84  | 40.26      | 16.82       | 24.13                | 11.06                | 35.20               | 136.70                  | 10-20        | 114                      | 1.2         |
| AV85  | 41.26      | 14.93       | 20.46                | 8.05                 | 28.51               | 123.79                  | 3-10         | 114                      | 1.4         |
| AV86  | 39.38      | 17.39       | 24.13                | 10.34                | 34.47               | 143.02                  | 20-30        | 114                      | 1.4         |
| AV87  | 37.18      | 14.91       | 20.01                | 7.79                 | 27.80               | 124.19                  | 3-10         | 107                      | 1.4         |
| AV88  | 40.71      | 16.50       | 20.23                | 8.25                 | 28.48               | 139.43                  | na           | 107                      | 1.45        |
| AV89  | 40.93      | 17.76       | 22.12                | 10.12                | 32.25               | 148.61                  | 20-30        | 114                      | 1.5         |
| AV90  | 39.93      | 16.12       | 24.66                | 9.02                 | 33.69               | 130.89                  | 10-20        | 112                      | 1.3         |
| AV91  | 44.9       | 16.24       | 25.48                | 9.66                 | 35.13               | 130.83                  | na           | 108                      | 1.5         |
| AV92  | 43.13      | 13.95       | 19.11                | 7.71                 | 26.82               | 115.35                  | 30-40        | 109                      | 1.4         |
| AV93  | 36.4       | 17.44       | 25.71                | 10.74                | 36.45               | 141.62                  | 10-20        | 112                      | 1.4         |
| AV94  | 38.94      | 15.85       | 23.23                | 12.25                | 35.49               | 126.35                  | na           | 107                      | 1.3         |
| AV95  | 44.68      | 15.78       | 20.21                | 10.81                | 31.02               | 129.88                  | 3-10         | 109                      | 1.23        |
| AV96  | 44.57      | 15.37       | 21.12                | 9.76                 | 30.88               | 125.81                  | 3-10         | 100                      | 0.95        |
| AV97  | 41.35      | 14.55       | 19.29                | 9.72                 | 29.01               | 119.21                  | 30-40        | 109                      | 1.3         |
| AV98  | 35.3       | 15.70       | 20.66                | 11.94                | 32.60               | 127.73                  | 3-10         | 109                      | 1.4         |
| AV99  | 39.27      | 14.71       | 23.95                | 12.50                | 36.44               | 114.31                  | 3-10         | 101                      | 1.2         |
| AV100 | 41.87      | 17.19       | 23.25                | 12.01                | 35.26               | 140.14                  | na           | 112                      | 1.5         |
| AV101 | 40.82      | 18.43       | 15.04                | 14.13                | 29.18               | 158.16                  | na           | 109                      | 1.5         |
| AV102 | 32.76      | 17.06       | 18.25                | 10.81                | 29.06               | 144.50                  | 3-10         | 122                      | 1.6         |
| AV103 | 36.62      | 16.67       | 20.88                | 12.66                | 33.54               | 136.54                  | 20-30        | 114                      | 1.5         |
| AV104 | 41.92      | 16.07       | 22.03                | 13.29                | 35.32               | 128.87                  | 3-10         | 107                      | 1.35        |
| AV105 | 36.29      | 19.62       | 17.44                | 17.78                | 35.22               | 164.57                  | 10-20        | 113                      | 1.4         |
| AV106 | 40.6       | 16.22       | 23.16                | 13.20                | 36.36               | 129.46                  | na           | 93                       | 1.1         |
| AV107 | 40.93      | 15.91       | 21.75                | 8.13                 | 29.88               | 136.31                  | 3-10         | 108                      | 1.3         |
| AV108 | 40.6       | 19.31       | 23.20                | 9.39                 | 32.58               | 163.70                  | 20-30        | 114                      | 1.4         |
| AV109 | 36.41      | 16.79       | 23.21                | 11.04                | 34.25               | 137.06                  | 20-30        | 122                      | 1.1         |
| AV110 | 28.9       | 14.89       | 17.65                | 9.86                 | 27.50               | 123.46                  | na           | 107                      | 1.35        |
| AV111 | 39.6       | 15.84       | 16.25                | 10.72                | 26.96               | 133.61                  | 20-30        | 114                      | 1.5         |
| AV112 | 38.28      | 15.17       | 18.88                | 12.26                | 31.13               | 122.91                  | 30-40        | 116                      | 1.5         |
| AV113 | 42.02      | 13.98       | 18.60                | 8.57                 | 27.17               | 114.70                  | 3-10         | 107                      | 1.4         |
| AV114 | 38.72      | 15.22       | 23.07                | 11.62                | 34.69               | 120.18                  | na           | 107                      | 1.3         |
| AV115 | 29.23      | 18.29       | 21.12                | 9.40                 | 30.52               | 154.64                  | 10-20        | 118                      | 1.1         |
| AV116 | 37.4       | 16.94       | 22.44                | 10.61                | 33.05               | 139.09                  | 10-20        | 114                      | 1.4         |
| AV117 | 39.93      | 17.39       | 21.22                | 7.46                 | 28.69               | 147.48                  | 20-30        | 114                      | 1.5         |
| AV118 | 42.25      | 15.95       | 23.27                | 8.65                 | 31.93               | 130.01                  | 20-30        | 112                      | 1.6         |
| AV119 | 38.5       | 15.40       | 21.83                | 8.54                 | 30.37               | 125.85                  | 3-10         | 110                      | 1.4         |
| AV120 | 40.6       | 18.19       | 26.08                | 12.26                | 38.34               | 146.61                  | na           | 112                      | 1.7         |
| AV121 | 33.76      | 18.37       | 19.66                | 10.38                | 30.04               | 156.27                  | 10-20        | 112                      | 1.6         |
| AV122 | 35.19      | 17.54       | 21.74                | 13.64                | 35.38               | 143.10                  | 10-20        | 112                      | 1.3         |
| AV123 | 33.54      | 15.85       | 10.30                | 9.12                 | 19.41               | 140.73                  | 3-10         | 109                      | 1.4         |
| AV124 | 35.08      | 17.46       | 24.97                | 13.03                | 38.00               | 139.83                  | 10-20        | 113                      | 1.3         |
| AV125 | 33.31      | 17.85       | 23.36                | 10.70                | 34.06               | 147.28                  | 10-20        | 116                      | 1.5         |
| AV126 | 38.83      | 17.55       | 18.85                | 13.81                | 32.66               | 145.61                  | 10-20        | 107                      | 1.5         |
| AV127 | 31.11      | 19.19       | 24.28                | 8.60                 | 32.88               | 161.90                  | 20-30        | 114                      | 1.5         |
| AV128 | 35.52      | 17.71       | 21.72                | 11.90                | 33.62               | 146.40                  | na           | 116                      | 1.5         |
| AV129 | 32.43      | 16.82       | 21.50                | 11.12                | 32.62               | 138.21                  | 10-20        | 106                      | 1.5         |
| AV130 | 40.6       | 16.21       | 23.11                | 11.87                | 34.98               | 129.86                  | na           | 107                      | 1.25        |
| AV131 | 39.93      | 15.62       | 19.12                | 10.37                | 29.49               | 129.15                  | na           | 107                      | 1.25        |
| AV132 | 38.5       | 15.77       | 22.04                | 10.36                | 32.40               | 127.90                  | 10-20        | 108                      | 1.4         |
| AV133 | 36.18      | 14.03       | 19.13                | 13.07                | 32.20               | 110.73                  | na           | 104                      | 1.7         |
| AV134 | 36.73      | 14.11       | 21.39                | 12.53                | 33.91               | 109.91                  | <3           | 107                      | 1.25        |
| AV135 | 33.98      | 13.09       | 17.43                | 11.86                | 29.28               | 103.95                  | na           | 92                       | 1.2         |
| AV136 | 36.4       | 15.50       | 21.37                | 10.23                | 31.60               | 125.93                  | 3-10         | 109                      | 1.4         |
| AV137 | 36.4       | 14.65       | 18.39                | 11.71                | 30.10               | 118.80                  | <3           | 101                      | 1.3         |
| AV138 | 40.38      | 13.83       | 19.95                | 11.36                | 31.31               | 109.44                  | <3           | 107                      | 1.2         |
| AV139 | 26.14      | 11.26       | 11.44                | 3.74                 | 15.18               | 98.39                   | 30-40        | na                       | na          |

**Supplementary Table S2.** Accession codes and information of the plant material used in this study.

| ID   | acce_num/cv_name | Country of Origin*       | Year | Type                |
|------|------------------|--------------------------|------|---------------------|
| AV1  | Frigante         | FR                       | ND   | Commercial cultivar |
| AV2  | Hamel            | ES, FR, IT               | ND   | Commercial cultivar |
| AV3  | Canyon           | DK, DE, UK               | ND   | Commercial cultivar |
| AV4  | Alcudia          | ES                       | ND   | Commercial cultivar |
| AV5  | Chimene          | ES, FR                   | ND   | Commercial cultivar |
| AV6  | Efesos           | AT                       | ND   | Commercial cultivar |
| AV7  | Scorpion         | CZ, DK, DE, EE, LT, LVDK | ND   | Commercial cultivar |
| AV8  | Rapidena         | ES                       | ND   | Commercial cultivar |
| AV9  | Primula          | IT                       | ND   | Commercial cultivar |
| AV10 | Chapline         | FR                       | ND   | Commercial cultivar |
| AV11 | PI 258563        | Tunisia                  | 1959 | Landrace            |
| AV12 | PI 258566        | Greece                   | 1959 | Landrace            |
| AV13 | PI 258569        | Italy                    | 1959 | Landrace            |
| AV14 | PI 258570        | Italy                    | 1959 | Landrace            |
| AV15 | PI 258571        | Spain                    | 1959 | Landrace            |
| AV16 | PI 258572        | Spain                    | 1959 | Landrace            |
| AV17 | PI 258579        | Greece                   | 1959 | Landrace            |
| AV18 | PI 258580        | Greece                   | 1959 | Landrace            |
| AV19 | PI 258584        | Greece                   | 1959 | Landrace            |
| AV20 | Clav 1013        | USA                      | 1920 | Landrace            |
| AV21 | Clav 1012        | USA                      | 1920 | Developed cultivar  |
| AV22 | Clav 1011        | USA                      | 1920 | Landrace            |
| AV23 | Clav 1010        | USA                      | 1920 | Landrace            |
| AV24 | Clav 1009        | USA                      | 1920 | Developed cultivar  |
| AV25 | Clav 1008        | USA                      | 1920 | Landrace            |
| AV26 | Clav 1007        | USA                      | 1920 | Landrace            |
| AV27 | Clav 1006        | USA                      | 1920 | Landrace            |
| AV28 | Clav 362         | Spain                    | 1904 | Landrace            |
| AV29 | Clav 357         | Greece                   | 1904 | Landrace            |
| AV30 | PI 51385         | Spain                    | 1920 | Landrace            |
| AV31 | PI 51384         | Spain                    | 1920 | Landrace            |
| AV32 | PI 51383         | Spain                    | 1920 | Landrace            |
| AV33 | PI 51382         | Spain                    | 1920 | Landrace            |
| AV34 | PI 51305         | Spain                    | 1920 | Landrace            |
| AV35 | PI 51304         | Spain                    | 1920 | Landrace            |
| AV36 | PI 51303         | Spain                    | 1920 | Landrace            |
| AV37 | PI 51302         | Spain                    | 1920 | Landrace            |
| AV38 | PI 51301         | Spain                    | 1920 | Landrace            |
| AV39 | PI 51300         | Spain                    | 1920 | Landrace            |
| AV40 | PI 158209        | Spain                    | 1947 | Landrace            |
| AV41 | PI 157883        | Italy                    | 1947 | Landrace            |
| AV49 | PI 110259        | Italy                    | 1935 | Landrace            |
| AV50 | PI 264427        | Greece                   | 1960 | Developed cultivar  |
| AV51 | PI 264838        | Greece                   | 1960 | Landrace            |
| AV52 | PI 264839        | Greece                   | 1960 | Landrace            |
| AV53 | PI 264840        | Greece                   | 1960 | Landrace            |
| AV54 | PI 264841        | Greece                   | 1960 | Landrace            |
| AV55 | PI 287264        | Greece                   | 1963 | Landrace            |
| AV56 | PI 287265        | Greece                   | 1963 | Landrace            |
| AV57 | PI 287266        | Greece                   | 1963 | Landrace            |
| AV58 | PI 287267        | Greece                   | 1963 | Landrace            |
| AV59 | PI 287269        | Greece                   | 1963 | Landrace            |
| AV60 | PI 110258        | Italy                    | 1935 | Landrace            |
| AV61 | PI 110257        | Italy                    | 1935 | Landrace            |
| AV62 | PI 110255        | Italy                    | 1935 | Landrace            |
| AV63 | PI 110254        | Italy                    | 1935 | Landrace            |
| AV64 | PI 61999         | Italy                    | 1924 | Landrace            |
| AV65 | PI 55521         | Tunisia                  | 1922 | Landrace            |
| AV66 | PI 55523         | Tunisia                  | 1922 | Landrace            |
| AV67 | PI 55524         | Tunisia                  | 1922 | Landrace            |
| AV68 | PI 58042         | Spain                    | 1923 | Landrace            |
| AV69 | PI 51386         | Spain                    | 1920 | Landrace            |
| AV70 | Clav 1030        | USA                      | 1920 | Landrace            |

**Supplementary Table S2.** Accession codes and information of the plant material used in this study.

| ID    | acce_num/cv_name | Country of Origin* | Year | Type               |
|-------|------------------|--------------------|------|--------------------|
| AV71  | Clav 1027        | USA                | 1920 | Landrace           |
| AV72  | Clav 1026        | USA                | 1920 | Landrace           |
| AV73  | Clav 1025        | USA                | 1920 | Landrace           |
| AV74  | Clav 1024        | USA                | 1920 | Developed cultivar |
| AV75  | Clav 1021        | USA                | 1920 | Landrace           |
| AV76  | Clav 1018        | USA                | 1920 | Landrace           |
| AV77  | Clav 1016        | USA                | 1920 | Landrace           |
| AV78  | Clav 1015        | USA                | 1920 | Developed cultivar |
| AV79  | Clav 1014        | USA                | 1920 | Landrace           |
| AV80  | PI 258585        | Greece             | 1959 | Landrace           |
| AV81  | PI 219764        | Greece             | 1954 | Landrace           |
| AV82  | PI 219763        | Greece             | 1954 | Landrace           |
| AV83  | PI 219762        | Greece             | 1954 | Landrace           |
| AV84  | PI 219761        | Greece             | 1954 | Landrace           |
| AV85  | PI 198908        | Italy              | 1951 | Landrace           |
| AV86  | PI 219760        | Greece             | 1954 | Landrace           |
| AV87  | PI 189767        | Tunisia            | 1950 | Landrace           |
| AV88  | PI 189766        | Tunisia            | 1950 | Landrace           |
| AV89  | PI 158229        | Spain              | 1947 | Landrace           |
| AV90  | PI 219765        | Greece             | 1954 | Landrace           |
| AV91  | PI 221276        | Italy              | 1954 | Landrace           |
| AV92  | PI 221277        | Italy              | 1954 | Landrace           |
| AV93  | PI 249721        | Greece             | 1958 | Landrace           |
| AV94  | PI 249932        | Greece             | 1958 | Landrace           |
| AV95  | PI 258548        | Italy              | 1959 | Landrace           |
| AV96  | PI 253347        | Spain              | 1958 | Landrace           |
| AV97  | PI 258560        | Tunisia            | 1959 | Landrace           |
| AV98  | PI 258561        | Tunisia            | 1959 | Landrace           |
| AV99  | PI 249933        | Greece             | 1958 | Landrace           |
| AV100 | Clav 1050        | USA                | 1920 | Landrace           |
| AV110 | PI 51199         | Spain              | 1920 | Landrace           |
| AV120 | Clav 2866        | Italy              | 1930 | Landrace           |
| AV130 | PI 287293        | Italy              | 1963 | Landrace           |
| AV101 | Clav 1049        | USA                | 1920 | Landrace           |
| AV102 | Clav 1046        | USA                | 1920 | Landrace           |
| AV103 | Clav 1041        | USA                | 1920 | Landrace           |
| AV104 | Clav 1039        | USA                | 1920 | Developed cultivar |
| AV105 | Clav 1038        | USA                | 1920 | Landrace           |
| AV106 | Clav 1035        | USA                | 1920 | Developed cultivar |
| AV107 | Clav 1034        | USA                | 1920 | Landrace           |
| AV108 | Clav 1033        | USA                | 1920 | Landrace           |
| AV109 | Clav 1031        | USA                | 1920 | Landrace           |
| AV111 | PI 51299         | Spain              | 1920 | Landrace           |
| AV112 | PI 51298         | Spain              | 1920 | Landrace           |
| AV113 | PI 51203         | Spain              | 1920 | Landrace           |
| AV114 | PI 51202         | Spain              | 1920 | Landrace           |
| AV115 | PI 25854         | Spain              | 1909 | Landrace           |
| AV116 | PI 25851         | Spain              | 1909 | Landrace           |
| AV117 | PI 25850         | Spain              | 1909 | Landrace           |
| AV118 | Clav 9109        | Spain              | 1971 | Landrace           |
| AV119 | Clav 9100        | Greece             | 1971 | Landrace           |
| AV121 | Clav 2864        | Italy              | 1930 | Developed cultivar |
| AV122 | Clav 1822        | Spain              | 1920 | Landrace           |
| AV123 | Clav 1820        | Spain              | 1920 | Landrace           |
| AV124 | Clav 1060        | USA                | 1920 | Landrace           |
| AV125 | Clav 1058        | USA                | 1920 | Developed cultivar |
| AV126 | Clav 1057        | USA                | 1920 | Landrace           |
| AV127 | Clav 1054        | USA                | 1920 | Developed cultivar |
| AV128 | Clav 1052        | USA                | 1920 | Landrace           |
| AV129 | Clav 1051        | USA                | 1920 | Landrace           |
| AV131 | PI 338516        | Greece             | 1968 | Landrace           |
| AV132 | PI 338517        | Greece             | 1968 | Landrace           |
| AV133 | PI 411398        | Tunisia            | 1975 | Landrace           |

**Supplementary Table S2.** Accession codes and information of the plant material used in this study.

| <b>ID</b> | <b>acce_num/cv_name</b> | <b>Country of Origin*</b> | <b>Year</b> | <b>Type</b>         |
|-----------|-------------------------|---------------------------|-------------|---------------------|
| AV134     | PI 564724               | Italy                     | 1993        | Developed cultivar  |
| AV135     | PI 564725               | Italy                     | 1993        | Developed cultivar  |
| AV136     | PI 564726               | Italy                     | 1993        | Developed cultivar  |
| AV137     | PI 158213               | Tunisia                   | 1947        | Landrace            |
| AV138     | Prevision               | ES                        | ND          | Commercial cultivar |
| AV139     | Aintree                 | ES                        | ND          | Commercial cultivar |

\*The origin of the commercial cultivars is that indicated in the *Common catalogue of varieties of agricultural plant species* (<http://ec.europa.eu/food/plant/propagation/catalogues/agri2011/73.html>)

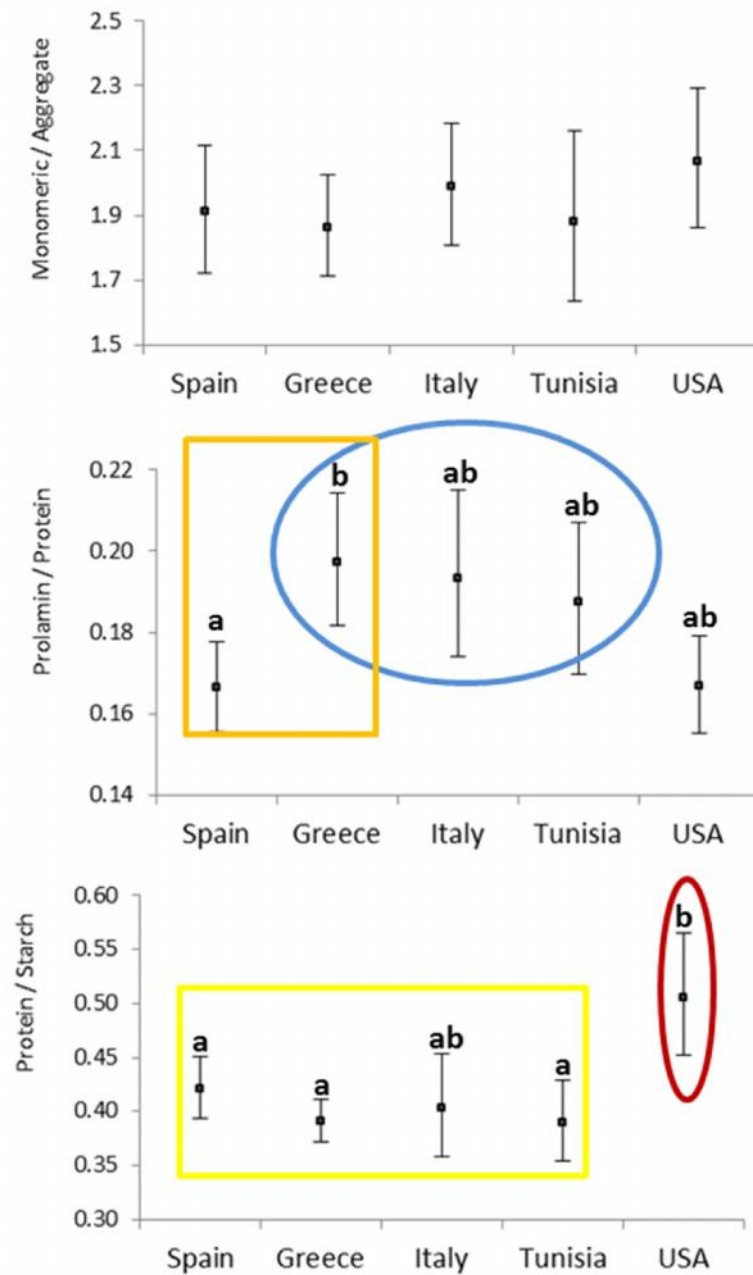

**Supplementary Figure S1.** Means and 95% CIs for flour quality composition ratios of oat accessions grouped by their origin. Yellow rectangles indicate no significant differences among Mediterranean accessions; Blue ovals and orange squares highlight differences between Spanish and Greek accessions. Red ovals indicate that a mean is significantly different from at least other three group means

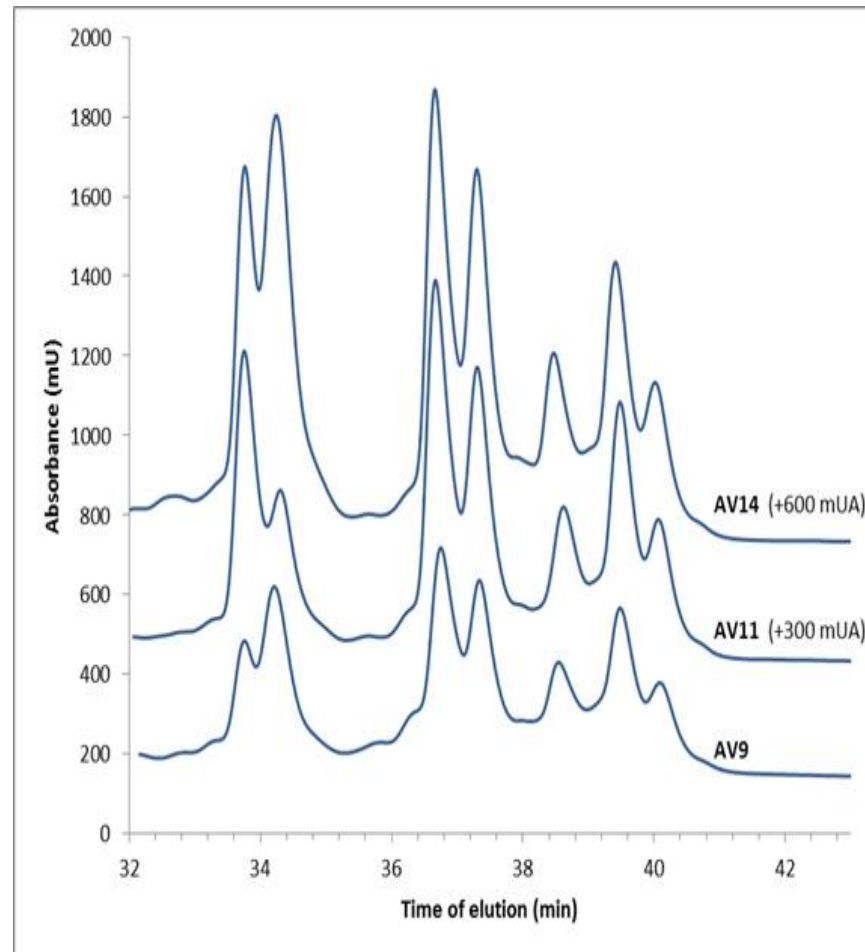

**Supplementary Figure S2.** Chromatograms of three oat accessions with the same pattern of peaks differing in relative peak height



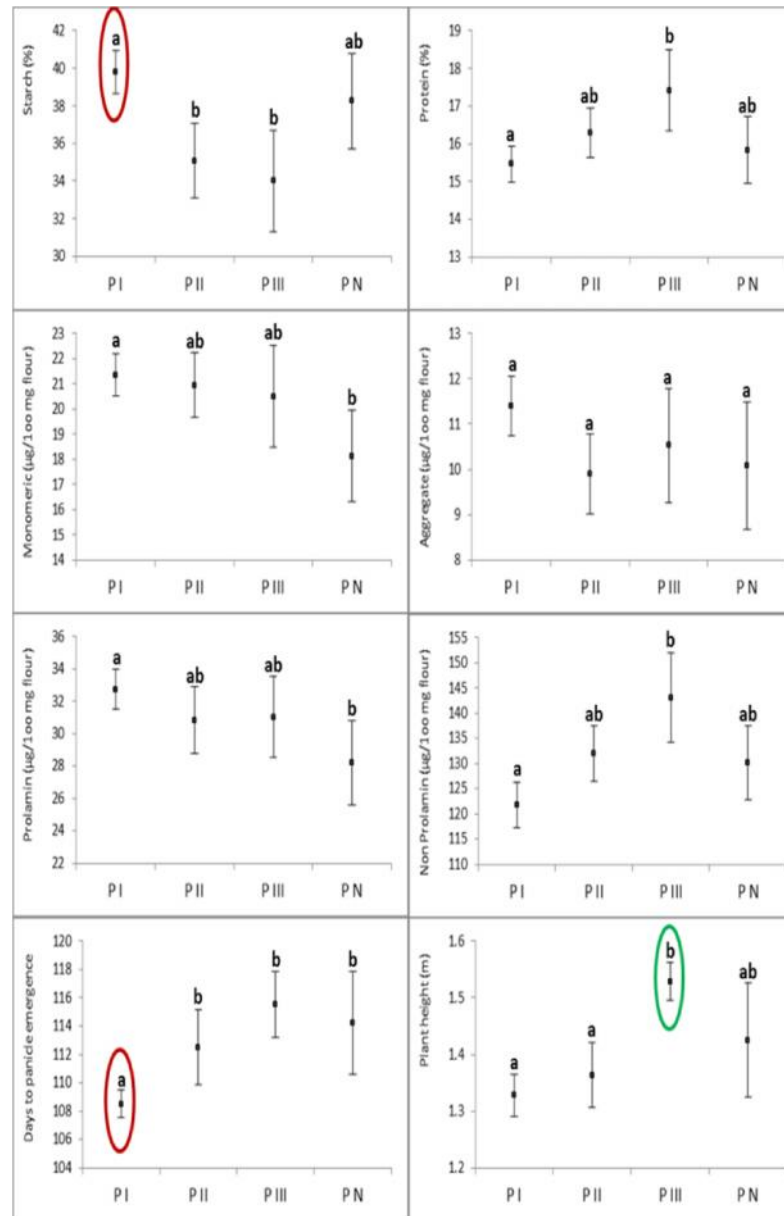

**Supplementary Figure S3.** Means and 95% CIs for plant features and flour composition of oat accessions grouped by their RP-HPLC pattern. Colored ovals indicate a significant difference between the mean of one group of lines and at least two other groups.

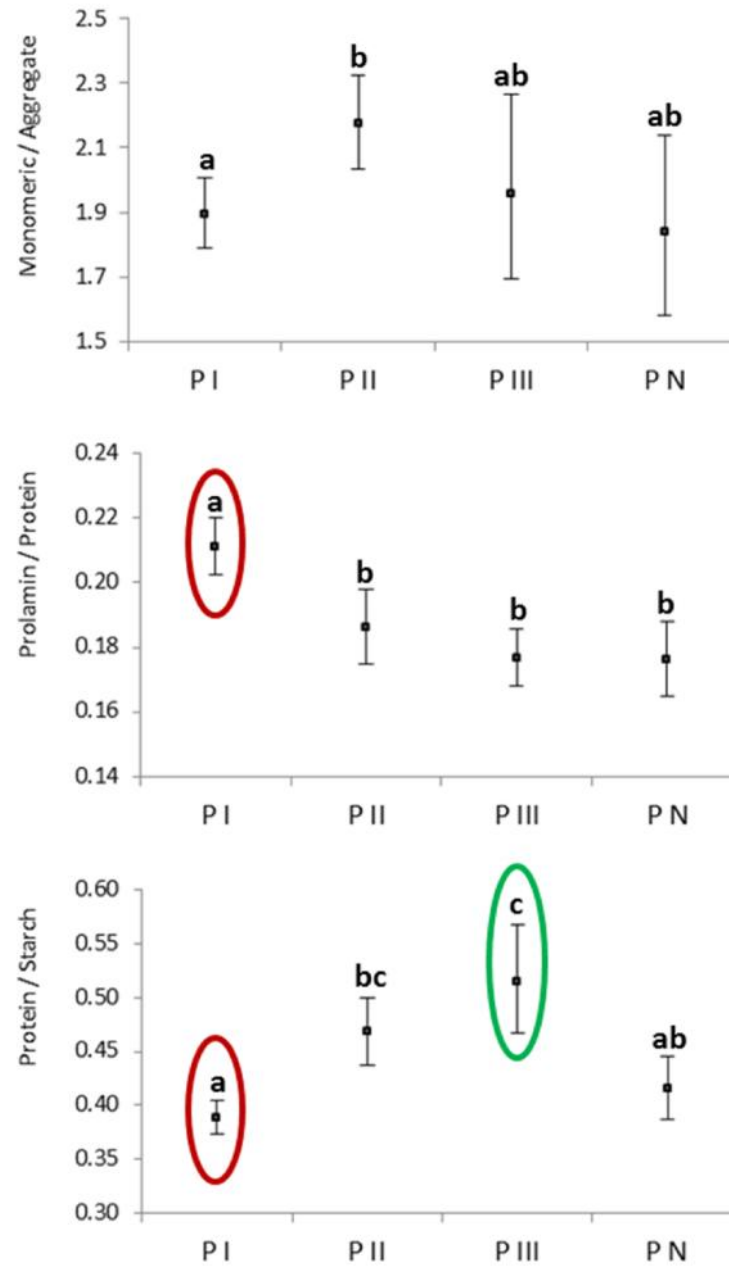

**Supplementary Figure S4.** Means and 95% CIs for flour quality composition ratios of oat accessions grouped by their RP-HPLC patterns. Colored ovals indicate a significant difference between the mean of one group of lines and at least two other groups.
